# Supplementary material
Source: publisher figshare collection journal article supplement (https://acs.figshare.com/ndownloader/files/3863584)
Supplement: Supplementary file 1 [file 3863584]

# Supporting Information

## **Maltopentaose-Conjugated CTA for RAFT Polymerization Generating Nanostructured Bioresource-Block Copolymer**

Daichi Togashi,<sup>†</sup> Issei Otsuka,<sup>‡,§</sup> Redouane Borsali,<sup>‡,§</sup> Koichi Takeda,<sup>†</sup>

Kazushi Enomoto,<sup>†</sup> Seigou Kawaguchi,<sup>†</sup> Atsushi Narumi<sup>\*,†</sup>

<sup>†</sup>Department of Polymer Science and Engineering, Graduate School of Science and  
Engineering, Yamagata University, Jonan 4-3-16, Yonezawa 992-8510, Japan

<sup>‡</sup>Univ. Grenoble Alpes, CERMAV, F-38000 Grenoble, France

<sup>§</sup>CNRS, CERMAV, F-38000 Grenoble, France

\*Corresponding author; e-mail: narumi@yz.yamagata-u.ac.jp

Tel & Fax: +81-(0)238-26-3829

## Experimental Section

### Instrument

The purity of  $\text{Mal}_5\text{-N}_3$  was determined by a size exclusion chromatography (SEC, pump: Jasco PU-2080 Plus, degasser: Jasco DG-2080-53, column oven: Jasco CO-2060 Plus, temperature of the column oven: 40 °C) in an aqueous solution containing 0.05 M  $\text{NaNO}_3$ . This SEC was equipped with the columns [Tosoh TSK-GEL G2500  $\text{PW}_{\text{XL}}$  (size: 7.8 mm  $\times$  300 mm, average bead size: 7  $\mu\text{m}$ , exclusion limit: 5.0  $\text{kg mol}^{-1}$ ), Tosoh TSK-GEL G4000  $\text{PW}_{\text{XL}}$  (size: 7.8 mm  $\times$  300 mm, average bead size: 10  $\mu\text{m}$ , exclusion limit:  $1.0 \times 10^3 \text{ kg mol}^{-1}$ ), and Tosoh TSK-GEL G6000  $\text{PW}_{\text{XL}}$  (size: 7.8 mm  $\times$  300 mm, average bead size: 13  $\mu\text{m}$ , exclusion limit:  $5.0 \times 10^4 \text{ kg mol}^{-1}$ )], and a refractive index detector (RI: Jasco RI-2031 Plus).

## Results and Discussion

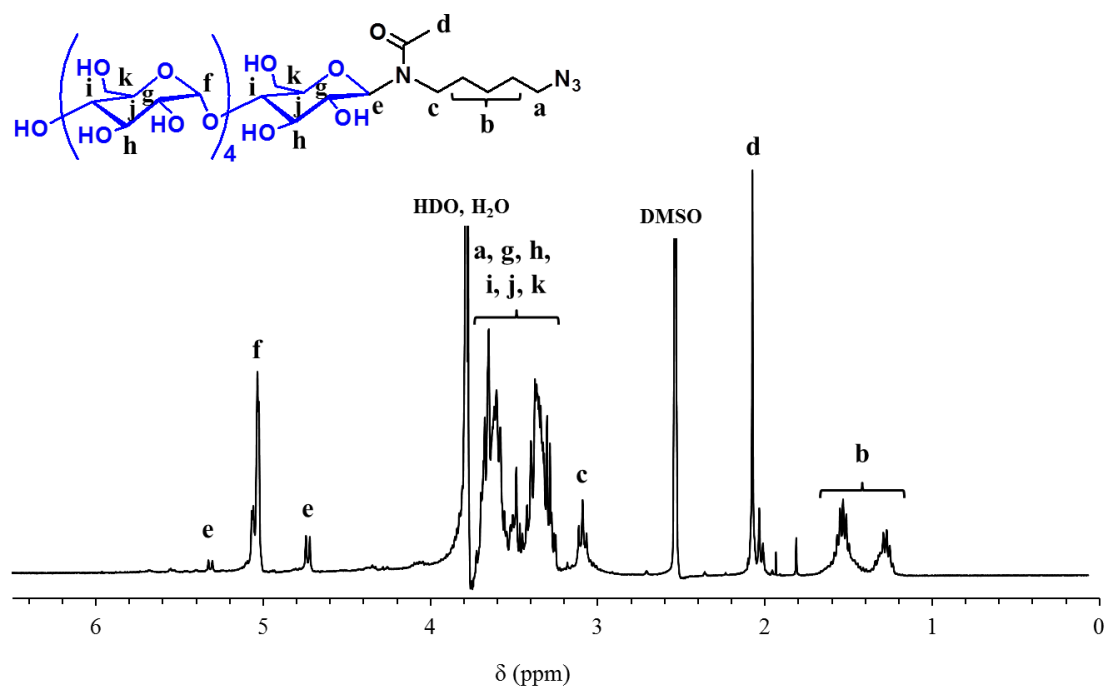

**Figure SI-1.** <sup>1</sup>H NMR spectrum of Mal<sub>5</sub>-N<sub>3</sub> in DMSO-*d*<sub>6</sub>/D<sub>2</sub>O.

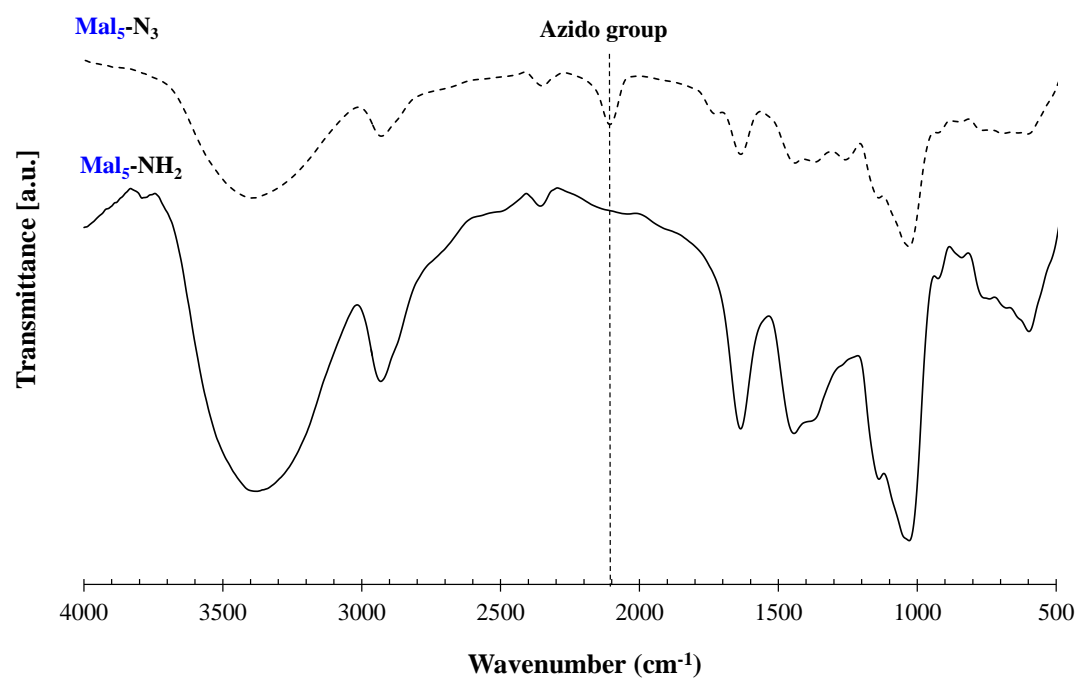

**Figure SI-2.** IR spectra of Mal<sub>5</sub>-N<sub>3</sub> (dashed line) and Mal<sub>5</sub>-NH<sub>2</sub> (solid line).

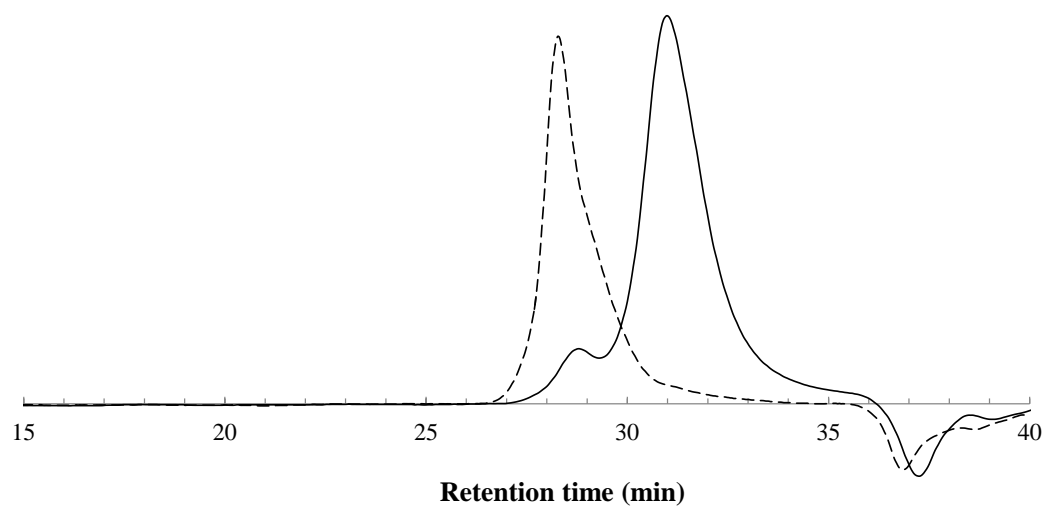

**Figure SI-3.** SEC traces of Mal<sub>5</sub>-N<sub>3</sub> (solid line) and Mal<sub>5</sub> (dashed line) in 0.05 M NaNO<sub>3</sub> aqueous solution.

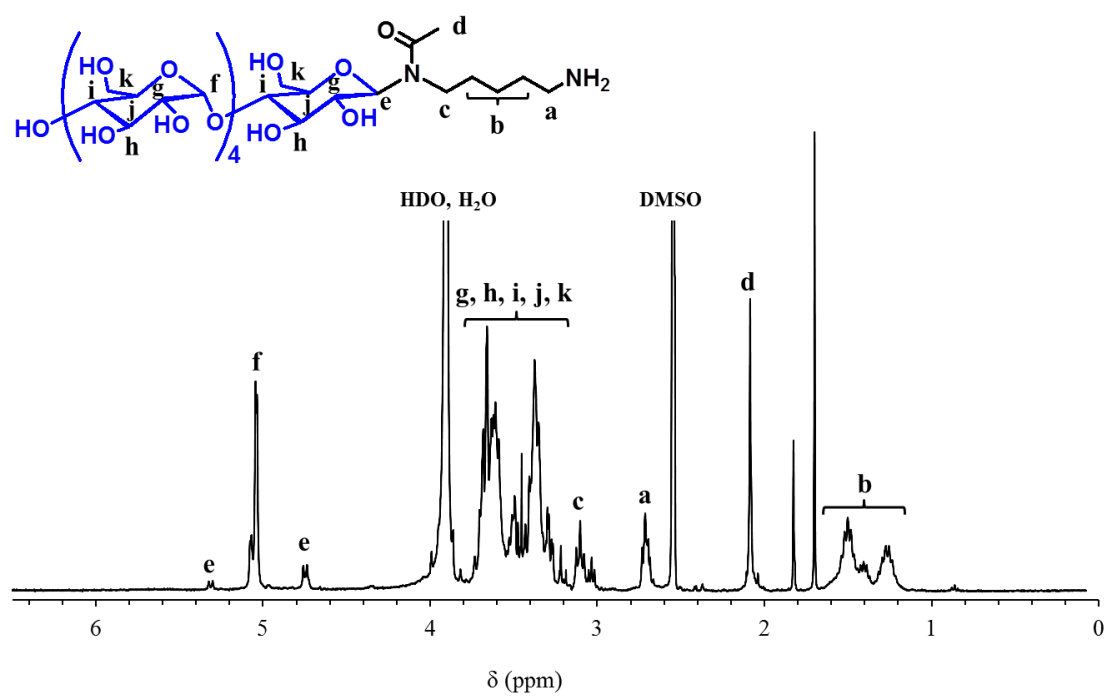

**Figure SI-4.** <sup>1</sup>H NMR spectrum of Mal<sub>5</sub>-NH<sub>2</sub> in DMSO-*d*<sub>6</sub>/D<sub>2</sub>O.

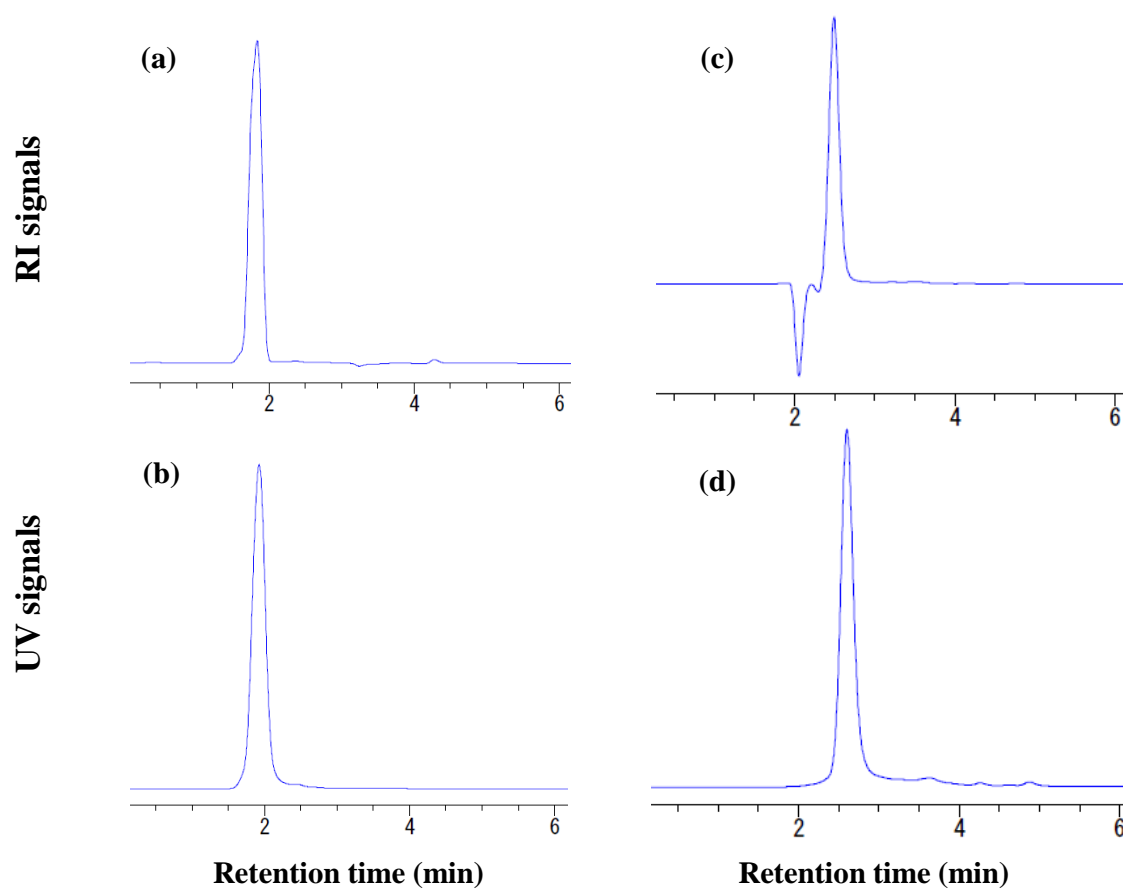

**Figure SI-5.** HPLC traces of (a and b) **1a** in  $\text{CH}_3\text{CN}/\text{H}_2\text{O} = 2/3$  and (c and d) **1b** in MeOH.

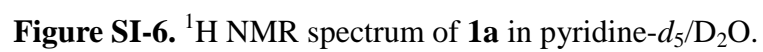



**Table SI-1. Solubility of Mal<sub>5</sub>-CTAs (**1**)<sup>a</sup>**

| Mal <sub>5</sub> -CTAs | H <sub>2</sub> O | CH <sub>3</sub> OH | DMF | DMSO | Toluene | CHCl <sub>3</sub> | 1,4-dioxane | THF |
|------------------------|------------------|--------------------|-----|------|---------|-------------------|-------------|-----|
| <b>1a</b>              | +                | +                  | +   | +    | —       | —                 | —           | —   |
| <b>1b</b>              | +                | +                  | +   | +    | —       | —                 | —           | +   |

<sup>a</sup>+, clear solution; —, suspension or precipitate.

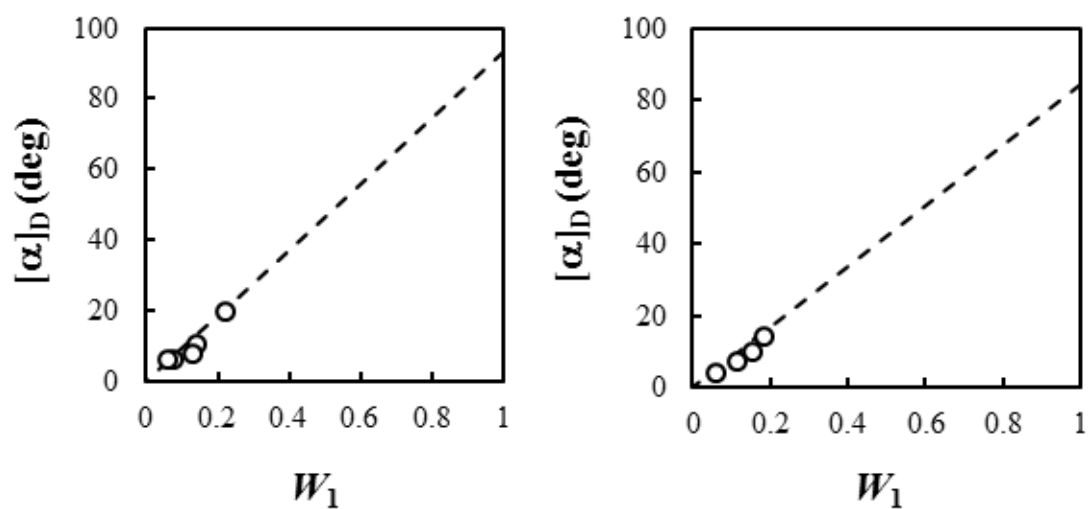

**Figure SI-7.** Plots of specific rotations for **2a** (left) and those for **2b** (right) as a function of their weight fractions of **1** ( $W_1$ s).

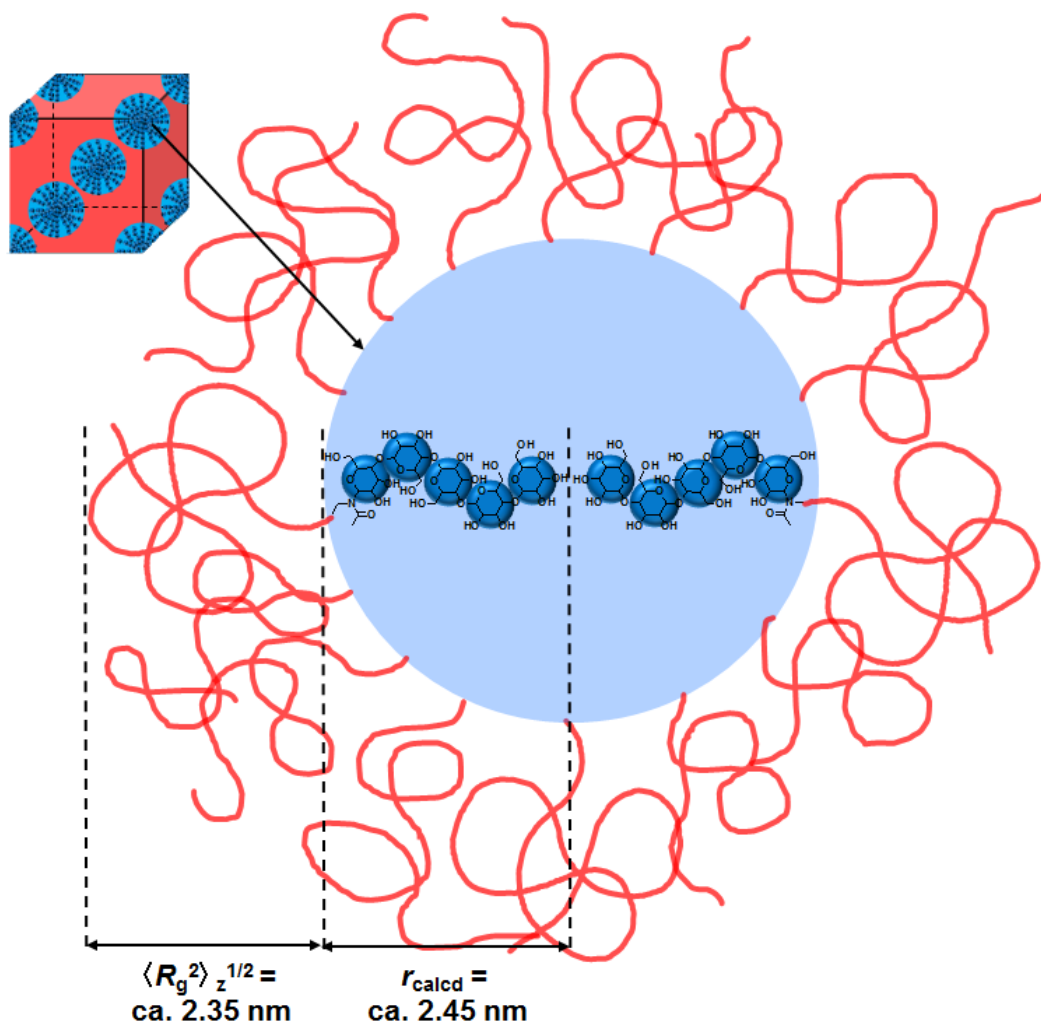

**Figure SI-8.** Supporting illustration representing  $r_{\text{calcd}}$  and z-averaged mean-square radius of gyration  $\langle R_g^2 \rangle_z^{1/2}$  for the phase separated structures formed by **2b-I**. The  $r_{\text{calcd}}$  was calculated on the basis of the bond lengths; C-C bond: 0.154 nm, C-O bond: 0.145 nm. The  $\langle R_g^2 \rangle_z^{1/2}$  was calculated by adopting the following equation.<sup>1</sup>

$$\langle R_g^2 \rangle_z^{1/2} = 1.12 \times 10^{-2} M_w^{0.60} \text{ (nm)}$$

## Reference

- (1) Konishi, T.; Yoshizaki, T.; Saito, T.; Einaga, Y.; Yamakawa, H. *Macromolecules* **1990**, *23*, 290-297.
